# Supplementary material
Source: PubMed Central journal article supplement (PMC4386256)
Supplement: CJN.07480714_CJN07480714SupplementaryData.pdf [file CJN.07480714_CJN07480714SupplementaryData.pdf]

Sahar A. Fathallah-Shaykh\*, Joseph T Flynn<sup>†</sup>, Christopher B Pierce<sup>§</sup>, Alison G Abraham<sup>§</sup>, Tom D. Blydt-Hansen<sup>¶</sup>, Susan F. Massengill<sup>¶¶</sup>, Marva M. Moxey-Mims<sup>††</sup>, Bradley A. Warady\*\*, Susan L. Furth<sup>‡‡</sup> and Craig S. Wong<sup>§§</sup>

#### Author Affiliations

*\*Department of Pediatrics, University of Alabama Birmingham, Birmingham, Alabama*  
*†Division of Nephrology, Seattle Children's Hospital, Seattle, Washington, §Department of Epidemiology, Johns Hopkins Bloomberg School of Public Health, Epidemiology & Clinical Research, Baltimore, Maryland, ¶Division of Pediatric Nephrology, Department of Pediatrics and Child Health, University of Manitoba, Winnipeg, Manitoba, ¶¶Levine Children's Hospital at Carolinas Medical Center, Charlotte, North Carolina, †† National Institute of Diabetes and Digestive and Kidney Diseases, NIH, Bethesda, Maryland;, \*\*Children's Mercy Hospital, Kansas City, Missouri, ‡‡Department of Epidemiology and Biostatistics, Perelman School of Medicine, University of Pennsylvania, Philadelphia, Pennsylvania, §§University of New Mexico, Albuquerque, New Mexico*
